# Supplementary material
Source: PubMed Central journal article supplement (PMC10074577)
Supplement: NIHMS1845938-supplement-Supplement.pdf [file NIHMS1845938-supplement-Supplement.pdf]

## SUPPLEMENTAL DIGITAL CONTENT

### Prenatal exposure to per- and polyfluoroalkyl substances and childhood autism-related outcomes

#### Table of Contents

|                                                                                                                                     |    |
|-------------------------------------------------------------------------------------------------------------------------------------|----|
| <b>eTable 1.</b> Final subsamples available for analysis, by cohort. ....                                                           | 2  |
| <b>eTable 2.</b> Descriptive Characteristics of Participants Contributing to Analyses, by NIH ECHO Cohort .....                     | 6  |
| <b>eTable 3.</b> Distributions of PFAS (untransformed values, $\mu\text{g/L}$ ) and % below the limit of detection (LOD). ....      | 9  |
| <b>eTable 4.</b> Associations of PFAS and SRS Raw Scores from Single-Pollutant Models .....                                         | 10 |
| <b>eTable 5.</b> Associations between PFAS and SRS total T-score stratified by SRS-2 form completed .....                           | 11 |
| <b>eTable 6.</b> Sensitivity analysis dropping samples below the LOD for the specific analytes with >20% values below the LOD. .... | 12 |
| <b>eTable 7.</b> Associations of PFAS and T-scores on SRS subscales from single-pollutant models .....                              | 13 |
| <b>eTable 8.</b> Associations of PFAS and ASD diagnoses from single-pollutant models.....                                           | 14 |
| <b>eTable 9.</b> Associations of PFAS and ASD diagnosis in mixture models using Bayesian Weighted Sums (n=809).....                 | 15 |
| <b>eTable 10.</b> Sex-stratified associations between PFAS and SRS total T-score .....                                              | 16 |
| <b>eTable 11.</b> Sex-stratified associations between PFAS and SRS using Bayesian Weighted Sums.....                                | 17 |
| <b>eFigure 1.</b> Directed acyclic graph <sup>a</sup> .....                                                                         | 18 |
| <b>eFigure 2.</b> Boxplots of PFAS analytes (log-transformed) in the pooled ECHO sample .....                                       | 19 |
| <b>eFigure 3.</b> Boxplots of PFAS analyte distributions (log-transformed) by ECHO cohort .....                                     | 20 |
| <b>eFigure 4.</b> Correlation plots of PFAS analytes .....                                                                          | 21 |
| <b>eFigure 5.</b> Coefficient plots of leave-one-out results for SRS total T-score.....                                             | 22 |

**eTable 1.** Final subsamples available for analysis, by cohort.

| Cohort                                                                                 | Eligibility criteria                                                                                                                                                                                                                                                                                                                       | Total enrolled | Measured PFAS |                      | Among those with PFAS, # with available outcome data |                      | Among those with PFAS, # missing outcome data |                      | Among those with PFAS and outcome data, # with singleton births |
|----------------------------------------------------------------------------------------|--------------------------------------------------------------------------------------------------------------------------------------------------------------------------------------------------------------------------------------------------------------------------------------------------------------------------------------------|----------------|---------------|----------------------|------------------------------------------------------|----------------------|-----------------------------------------------|----------------------|-----------------------------------------------------------------|
|                                                                                        |                                                                                                                                                                                                                                                                                                                                            |                | n             | % <sup>a</sup>       | n                                                    | % <sup>b</sup>       | n                                             | % <sup>b</sup>       |                                                                 |
|                                                                                        |                                                                                                                                                                                                                                                                                                                                            | <b>N</b>       | <b>n</b>      | <b>%<sup>a</sup></b> | <b>n</b>                                             | <b>%<sup>b</sup></b> | <b>n</b>                                      | <b>%<sup>b</sup></b> | <b>n</b>                                                        |
| <b>Project Viva<sup>1</sup></b>                                                        | Eligible women were fluent in English, had singleton pregnancies, had pregnancies of <22 weeks' gestation, and had no plans to move away from the study area                                                                                                                                                                               | 1224           | 850           | 69%                  | 467                                                  | 55%                  | 383                                           | 45%                  | 467                                                             |
| <b>New Hampshire Birth Cohort Study (NHBCS)<sup>2</sup></b>                            | Eligible women were 18-45 years old, fluent in English, had singleton pregnancies, and used a private, unregulated water system (e.g., private well) at home.                                                                                                                                                                              | 2238           | 325           | 15%                  | 318                                                  | 98%                  | 7                                             | 2%                   | 318                                                             |
| <b>Healthy Start<sup>3</sup></b>                                                       | Eligible women were ≥16 years old, had singleton pregnancies, and had no history of previous stillbirth or extremely preterm birth, and no self-reported history of diabetes, cancer, asthma treated with steroids, or psychiatric conditions                                                                                              | 1379           | 651           | 47%                  | 184                                                  | 28%                  | 467                                           | 72%                  | 184                                                             |
| <b>University of California-Markers of Autism Risk in Babies (MARBLER)<sup>4</sup></b> | Eligible women had one or more biological child(ren) or first degree relatives with ASD or the gestating child had an older half-sibling with ASD b) Mother was ≥18 years old; d) Mother was proficient in English and the gestating child would be taught to speak English; e) Mother lived within 2.5 hrs of the Davis/Sacramento region | 381            | 44            | 12%                  | 31                                                   | 70%                  | 13                                            | 30%                  | 31                                                              |

|                                                                       |                                                                                                                                                                                                                                                                             |      |     |     |     |     |     |     |     |
|-----------------------------------------------------------------------|-----------------------------------------------------------------------------------------------------------------------------------------------------------------------------------------------------------------------------------------------------------------------------|------|-----|-----|-----|-----|-----|-----|-----|
| <b>Emory University Atlanta<sup>5</sup></b>                           | Eligible women were self-reported Black/African American race/ethnicity, had singleton pregnancies, self-reported that they were born in the United States, had English fluency, were aged 18–40 years old, and did not have IVF or pre-existing chronic medical conditions | 268  | 245 | 91% | 144 | 59% | 101 | 41% | 144 |
| <b>Pregnancy Environment and Lifestyle Study (PETALS)<sup>6</sup></b> | Eligible women were aged 18–45 years, able to provide informed consent in English, had singleton pregnancies, and did not have a pre-conception history of diabetes, cancer, hepatitis C, or liver cirrhosis.                                                               | 1428 | 124 | 9%  | 78  | 63% | 46  | 37% | 78  |
| <b>Rochester<sup>7</sup></b>                                          | Eligible women were ≥18 years old, had singleton pregnancies, and had no known substance abuse issues or history of psychotic illness, no major endocrine disorder, high-risk health condition, or significant obstetric concern at baseline.                               | 296  | 273 | 92% | 102 | 37% | 171 | 63% | 102 |
| <b>Kaiser Permanente Research Bank (KPRB)<sup>8</sup></b>             | Eligible women were members of KPNC healthcare delivery system during their pregnancy, were ≥18 years old, and initiated prenatal care at a KPNC medical facility where cohort recruitment was taking place.                                                                | 1250 | 13  | 1%  | 12  | 92% | 1   | 8%  | 12  |
| <b>Chemicals in our Bodies (CIOB)<sup>9</sup></b>                     | Eligible mothers were fluent in English or Spanish, had singleton births, were ≥18 years of age, and had no major pregnancy complications                                                                                                                                   | 500  | 441 | 88% | 67  | 15% | 374 | 85% | 67  |

|                                                                                                                                                          |                                                                                                                                                                                                        |     |     |     |    |     |     |     |    |
|----------------------------------------------------------------------------------------------------------------------------------------------------------|--------------------------------------------------------------------------------------------------------------------------------------------------------------------------------------------------------|-----|-----|-----|----|-----|-----|-----|----|
| <b>Illinois Kids Development Study (IKIDS)<sup>10</sup></b>                                                                                              | Eligible mothers were 18–40 years old, had singleton pregnancies, were not in a high-risk pregnancy, were fluent in English, and were not planning to leave the area before the child’s first birthday | 588 | 225 | 38% | 26 | 12% | 199 | 88% | 26 |
| <sup>a</sup> Proportion calculated using total enrolled N as denominator<br><sup>b</sup> Proportion calculated using n with PFAS measured as denominator |                                                                                                                                                                                                        |     |     |     |    |     |     |     |    |

## Reference:

1. Oken E, Baccarelli AA, Gold DR, et al. Cohort profile: project viva. *Int J Epidemiol*. Feb 2015;44(1):37-48. doi:10.1093/ije/dyu008
2. Gilbert-Diamond D, Emond JA, Baker ER, Korrick SA, Karagas MR. Relation between in Utero Arsenic Exposure and Birth Outcomes in a Cohort of Mothers and Their Newborns from New Hampshire. *Environ Health Perspect*. Aug 2016;124(8):1299-307. doi:10.1289/ehp.1510065
3. Starling AP, Adgate JL, Hamman RF, et al. Perfluoroalkyl Substances during Pregnancy and Offspring Weight and Adiposity at Birth: Examining Mediation by Maternal Fasting Glucose in the Healthy Start Study. *Environ Health Perspect*. Jun 26 2017;125(6):067016. doi:10.1289/EHP641
4. Hertz-Picciotto I, Schmidt RJ, Walker CK, et al. A Prospective Study of Environmental Exposures and Early Biomarkers in Autism Spectrum Disorder: Design, Protocols, and Preliminary Data from the MARBLES Study. *Environ Health Perspect*. Nov 2018;126(11):117004. doi:10.1289/EHP535
5. Brennan PA, Dunlop AL, Smith AK, Kramer M, Mulle J, Corwin EJ. Protocol for the Emory University African American maternal stress and infant gut microbiome cohort study. *BMC Pediatr*. Jul 22 2019;19(1):246. doi:10.1186/s12887-019-1630-4
6. Zhu Y, Hedderson MM, Feng J, Mevi AA, Ferrara A. The Pregnancy Environment and Lifestyle Study (PETALS): a population-based longitudinal multi-racial birth cohort. *BMC Pregnancy Childbirth*. Apr 17 2017;17(1):122. doi:10.1186/s12884-017-1301-0
7. O'Connor T, Best M, Brunner J, et al. Cohort profile: Understanding Pregnancy Signals and Infant Development (UPSIDE): a pregnancy cohort study on prenatal exposure mechanisms for child health. *BMJ Open*. Apr 1 2021;11(4):e044798. doi:10.1136/bmjopen-2020-044798
8. Hedderson MM, Ferrara A, Avalos LA, et al. The Kaiser Permanente Northern California research program on genes, environment, and health (RPGEH) pregnancy cohort: study design, methodology and baseline characteristics. *BMC Pregnancy Childbirth*. Nov 29 2016;16(1):381. doi:10.1186/s12884-016-1150-2

9. Morello-Frosch R, Cushing LJ, Jesdale BM, et al. Environmental Chemicals in an Urban Population of Pregnant Women and Their Newborns from San Francisco. *Environ Sci Technol*. Nov 15 2016;50(22):12464-12472. doi:10.1021/acs.est.6b03492
10. Eick SM, Enright EA, Geiger SD, et al. Associations of Maternal Stress, Prenatal Exposure to Per- and Polyfluoroalkyl Substances (PFAS), and Demographic Risk Factors with Birth Outcomes and Offspring Neurodevelopment: An Overview of the ECHO.CA.IL Prospective Birth Cohorts. *Int J Environ Res Public Health*. Jan 16 2021;18(2)doi:10.3390/ijerph18020742

**eTable 2.** Descriptive Characteristics of Participants Contributing to Analyses, by NIH ECHO Cohort

|                                             | Healthy Start<br>(N=184) | Emory<br>(N=144) | KP<br>PETALS<br>(N=78) | KPRB<br>(N=12) | NHBCS<br>(N=318) | MARBLES<br>(N=31) | Rochester<br>(N=102) | Project<br>Viva<br>(N=467) | IKIDS<br>(N=26) | CIOB<br>(N=67) |
|---------------------------------------------|--------------------------|------------------|------------------------|----------------|------------------|-------------------|----------------------|----------------------------|-----------------|----------------|
| <b>Maternal Age</b>                         |                          |                  |                        |                |                  |                   |                      |                            |                 |                |
| <25                                         | 36 (19.6%)               | 64 (44.4%)       | <5                     | <5             | 21 (6.6%)        | 0 (0%)            | <5                   | 20 (4.3%)                  | 0 (0%)          | <5             |
| 25-29                                       | 41 (22.3%)               | 43 (29.9%)       | <15                    | <5             | 88 (27.7%)       | 6 (19.4%)         | <30                  | 69 (14.8%)                 | 7 (26.9%)       | <5             |
| 30-34                                       | 67 (36.4%)               | 31 (21.5%)       | 33 (42.3%)             | 5 (41.7%)      | 145<br>(45.6%)   | 6 (19.4%)         | 49<br>(48.0%)        | 196<br>(42.0%)             | 15<br>(57.7%)   | 24<br>(35.8%)  |
| >=35                                        | 40 (21.7%)               | 6 (4.2%)         | 30 (38.5%)             | <5             | 64 (20.1%)       | 19 (61.3%)        | 23<br>(22.5%)        | 182<br>(39.0%)             | <5              | 35<br>(52.2%)  |
| <b>Maternal Education</b>                   |                          |                  |                        |                |                  |                   |                      |                            |                 |                |
| Up To High school degree, GED or Equivalent | 33 (17.9%)               | 80 (55.6%)       | 8 (10.3%)              | 0 (0%)         | 35 (11.0%)       | <5                | 17<br>(16.7%)        | 27 (5.8%)                  | 0 (0%)          | <5             |
| Some college, no degree                     | 40 (21.7%)               | 41 (28.5%)       | 24 (30.8%)             | <5             | 59 (18.6%)       | 12 (38.7%)        | 11<br>(10.8%)        | <85                        | <5              | 5 (7.5%)       |
| Bachelor's and above                        | 111 (60.3%)              | 23 (16.0%)       | 46 (59.0%)             | <8             | 211<br>(66.4%)   | 15 (48.4%)        | 66<br>(64.7%)        | 353<br>(75.6%)             | <25             | 58<br>(86.6%)  |
| Missing                                     | 0 (0%)                   | 0 (0%)           | 0 (0%)                 | 6 (50.0%)      | 13 (4.1%)        | <5                | 8 (7.8%)             | <5                         | 0 (0%)          | <5             |
| <b>Maternal Race</b>                        |                          |                  |                        |                |                  |                   |                      |                            |                 |                |
| Hispanic All                                | 36 (19.6%)               | <5               | 30 (38.5%)             | 7 (58.3%)      | 9 (2.8%)         | 10 (32.3%)        | 8 (7.8%)             | 38 (8.1%)                  | <5              | 9 (13.4%)      |
| Non-Hispanic Black                          | 21 (11.4%)               | 139<br>(96.5%)   | <5                     | <5             | 0 (0%)           | 0 (0%)            | 15<br>(14.7%)        | 49 (10.5%)                 | <5              | <5             |
| Non-Hispanic Other                          | 11 (6.0%)                | <5               | 26 (33.3%)             | <5             | 8 (2.5%)         | <5                | 7 (6.9%)             | 40 (8.6%)                  | <5              | 21<br>(31.3%)  |
| Non-Hispanic White                          | 116 (63.0%)              | 0 (0%)           | 20 (25.6%)             | <5             | 297<br>(93.4%)   | 17 (54.8%)        | 72<br>(70.6%)        | 339<br>(72.6%)             | 22<br>(84.6%)   | 32<br>(47.8%)  |
| Missing                                     | 0 (0%)                   | 0 (0%)           | 0 (0%)                 | 0 (0%)         | <5               | 0 (0%)            | 0 (0%)               | <5                         | 0 (0%)          | <5             |
| <b>Parity</b>                               |                          |                  |                        |                |                  |                   |                      |                            |                 |                |
| Nulliparous                                 | 120 (65.2%)              | 57 (39.6%)       | 36 (46.2%)             | 5 (41.7%)      | 137<br>(43.1%)   | 0 (0%)            | 27<br>(26.5%)        | 225<br>(48.2%)             | 18<br>(69.2%)   | 62<br>(92.5%)  |
|                                             | 64 (34.8%)               | 87 (60.4%)       | 42 (53.8%)             | 7 (58.3%)      | 157<br>(49.4%)   | <25               | <75                  | 242<br>(51.8%)             | 8 (30.8%)       | <5             |
| Missing                                     | 0 (0%)                   | 0 (0%)           | 0 (0%)                 | 0 (0%)         | 24 (7.5%)        | <5                | <5                   | 0 (0%)                     | 0 (0%)          | <5             |

| <b>Infant Sex</b>                        |                   |                   |                   |             |                   |                   |                   |                   |                   |                   |
|------------------------------------------|-------------------|-------------------|-------------------|-------------|-------------------|-------------------|-------------------|-------------------|-------------------|-------------------|
| Female                                   | 86 (46.7%)        | 66 (45.8%)        | 42 (53.8%)        | 7 (58.3%)   | 168 (52.8%)       | 12 (38.7%)        | 48 (47.1%)        | 255 (54.6%)       | 18 (69.2%)        | 32 (47.8%)        |
| Male                                     | 98 (53.3%)        | 78 (54.2%)        | 36 (46.2%)        | 5 (41.7%)   | 150 (47.2%)       | 19 (61.3%)        | 54 (52.9%)        | 212 (45.4%)       | 8 (30.8%)         | 35 (52.2%)        |
| <b>Year of Birth</b>                     |                   |                   |                   |             |                   |                   |                   |                   |                   |                   |
| 1991-2000                                | 0 (0%)            | 0 (0%)            | 0 (0%)            | 0 (0%)      | 0 (0%)            | 0 (0%)            | 0 (0%)            | 181 (38.8%)       | 0 (0%)            | 0 (0%)            |
| 2001-2010                                | 40 (21.7%)        | 0 (0%)            | 0 (0%)            | 0 (0%)      | 42 (13.2%)        | 6 (19.4%)         | 0 (0%)            | 286 (61.2%)       | 0 (0%)            | 0 (0%)            |
| 2011-2019                                | 144 (78.3%)       | 144 (100%)        | 78 (100%)         | 12 (100%)   | 276 (86.8%)       | 25 (80.6%)        | 102 (100%)        | 0 (0%)            | 26 (100%)         | 67 (100%)         |
| <b>Total SRS Raw Score</b>               |                   |                   |                   |             |                   |                   |                   |                   |                   |                   |
| Mean (SD)                                | 28.8 (18.4)       | 37.0 (22.1)       | 32.2 (15.2)       | NA (NA)     | 28.1 (15.2)       | 52.0 (23.3)       | 29.6 (17.5)       | 25.6 (18.4)       | 28.4 (17.8)       | 29.0 (15.2)       |
| Median [Min, Max]                        | 25.0 [3.00, 130]  | 33.0 [8.00, 133]  | 30.0 [7.00, 71.0] | NA [NA, NA] | 25.0 [2.00, 133]  | 51.0 [6.00, 108]  | 25.5 [6.00, 122]  | 21.0 [3.00, 129]  | 24.0 [6.00, 83.0] | 27.0 [5.00, 91.0] |
| Non-Missing                              | 166 (90.2%)       | 61 (42.4%)        | 53 (67.9%)        | 0 (0%)      | 318 (100%)        | 31 (100%)         | 102 (100%)        | 414 (88.7%)       | 26 (100%)         | 53 (79.1%)        |
| <b>Total SRS T-score</b>                 |                   |                   |                   |             |                   |                   |                   |                   |                   |                   |
| Mean (SD)                                | 48.9 (7.33)       | 48.8 (8.66)       | 50.4 (6.01)       | NA (NA)     | 45.8 (6.39)       | 55.1 (8.48)       | 45.3 (6.79)       | 47.7 (7.46)       | 45.1 (7.46)       | 45.1 (5.85)       |
| Median [Min, Max]                        | 47.0 [38.0, 88.0] | 47.0 [37.0, 85.0] | 50.0 [40.0, 65.0] | NA [NA, NA] | 45.0 [35.0, 89.0] | 54.0 [39.0, 76.0] | 44.0 [36.0, 81.0] | 46.0 [38.0, 88.0] | 43.0 [36.0, 66.0] | 44.0 [36.0, 69.0] |
| Non-Missing                              | 166 (90.2%)       | 61 (42.4%)        | 53 (67.9%)        | 0 (0%)      | 318 (100%)        | 31 (100%)         | 102 (100%)        | 414 (88.7%)       | 26 (100%)         | 53 (79.1%)        |
| <b>Child Age Group at SRS assessment</b> |                   |                   |                   |             |                   |                   |                   |                   |                   |                   |
| SRS Second Edition (SRS-2) Preschool     | 0 (0%)            | 52 (36.1%)        | 0 (0%)            | 0 (0%)      | 238 (74.8%)       | <22               | 102 (100%)        | 0 (0%)            | <28               | 53 (79.1%)        |
| SRS Second Edition (SRS-2) School Age    | 166 (90.2%)       | 9 (6.2%)          | 53 (67.9%)        | 0 (0%)      | 80 (25.2%)        | <12               | 0 (0%)            | 414 (88.7%)       | <5                | 0 (0%)            |
| Missing                                  | 18 (9.8%)         | 83 (57.6%)        | 25 (32.1%)        | 12 (100%)   | 0 (0%)            | 0 (0%)            | 0 (0%)            | 53 (11.3%)        | 0 (0%)            | 14 (20.9%)        |

---

| <b>Clinical ASD dx</b> |             |                |        |           |        |            |               |                |     |               |
|------------------------|-------------|----------------|--------|-----------|--------|------------|---------------|----------------|-----|---------------|
| No                     | 175 (95.1%) | 139<br>(96.5%) | <78    | 12 (100%) | 0 (0%) | 12 (38.7%) | 0 (0%)        | 448<br>(95.9%) | <25 | 65<br>(97.0%) |
| Yes                    | <5          | <5             | <5     | 0 (0%)    | <5     | 7 (22.6%)  | 0 (0%)        | <20            | <5  | <5            |
| Missing                | <8          | <5             | 0 (0%) | 0 (0%)    | <320   | 12 (38.7%) | 102<br>(100%) | <5             | <5  | <5            |

---

Note that for protection of participant confidentiality in the ECHO data use agreement, we cannot report exact counts in cells with <5 participants.



**eTable 3.** Distributions of PFAS (untransformed values, µg/L) and % below the limit of detection (LOD).

| Analyte           | n    | %<br>above<br>LOD | 5th<br>Percentile | 25th<br>Percentile | 50th<br>Percentile | 75th<br>Percentile | 95th<br>Percentile |
|-------------------|------|-------------------|-------------------|--------------------|--------------------|--------------------|--------------------|
| EtFOSAA           | 833  | 59.8              | 0.014             | 0.023              | 0.5                | 1.2                | 2.94               |
| NMFOSAA_MeFOSAA   | 1259 | 70.7              | 0.022             | 0.071              | 0.153              | 1.3                | 3.61               |
| PFDA              | 1329 | 70.4              | 0.025             | 0.071              | 0.1                | 0.2                | 0.4                |
| PFHXS             | 1428 | 99.3              | 0.281             | 0.7                | 1.2                | 2.1                | 5.3                |
| PFNA              | 1428 | 99                | 0.144             | 0.3                | 0.5                | 0.7                | 1.393              |
| PFOA <sup>a</sup> | 1429 | 99.6              | 0.314             | 0.8                | 1.5                | 3.9                | 8.9                |
| PFOS <sup>a</sup> | 1428 | 99.8              | 0.902             | 1.919              | 3.35               | 16.725             | 39.46              |
| PFUNDA            | 730  | 59.5              | 0.014             | 0.062              | 0.071              | 0.142              | 0.3                |

EtFOSAA, 2-(N-Ethyl-perfluorooctane sulfonamido) acetic acid; NMFOSAA\_MeFOSAA, N-methyl perfluorooctane sulfonamido acetic acid; PFAS, per- and polyfluoroalkyl substances; PFDA, perfluorodecanoic acid; PFHXS, perfluorohexanesulfonic acid; PFNA, perfluorononanoic acid; PFOA, perfluorooctanoic acid; PFOS, perfluorooctane sulfonate; PFUNDA, perfluoroundecanoic acid.

<sup>a</sup> If a cohort had measured branched and linear chain isomers for PFOA or PFOS separately, the two were summed as total PFOA or PFOS in accordance with the CDC protocol.<sup>1</sup>

**Reference:**

1. CDC. *National Health and Nutrition Examination Survey: 2013-2014 Data Documentation, Codebook, and Frequencies*. 2016. [https://wwwn.cdc.gov/Nchs/Nhanes/2013-2014/SSPFAS\\_H.htm](https://wwwn.cdc.gov/Nchs/Nhanes/2013-2014/SSPFAS_H.htm)

**eTable 4.** Associations of PFAS and SRS Raw Scores from Single-Pollutant Models

| PFAS analyte    | SRS total raw score |                                     |
|-----------------|---------------------|-------------------------------------|
|                 | n <sub>adj</sub>    | $\beta_{adj}$ (95% CI) <sup>a</sup> |
| EtFOSAA         | 675                 | 1.8 (-3.2, 6.8)                     |
| NMFOSAA_MeFOSAA | 1032                | 1.3 (-2.0, 4.6)                     |
| PFDA            | 1096                | 2.1 (-1.3, 5.4)                     |
| PFHXS           | 1168                | -2.0 (-5.1, 1.2)                    |
| PFNA            | 1168                | 3.6 (-0.3, 7.5)                     |
| PFOA            | 1169                | 0.6 (-3.5, 4.6)                     |
| PFOS            | 1168                | 0.4 (-3.6, 4.4)                     |
| PFuNDA          | 567                 | -0.4 (-4.8, 4.1)                    |

CI, confidence interval; EtFOSAA, 2-(N-Ethyl-perfluorooctane sulfonamido) acetic acid; NMFOSAA\_MeFOSAA, N-methyl perfluorooctane sulfonamido acetic acid; PFDA, perfluorodecanoic acid; PFHXS, perfluorohexanesulfonic acid; PFNA, perfluorononanoic acid; PFOA, perfluorooctanoic acid; PFOS, perfluorooctane sulfonate; PFuNDA, perfluoroundecanoic acid; SRS, Social Responsiveness Scale.

<sup>a</sup>Adjusted models included ECHO cohort, maternal age, race/ethnicity, educational attainment, parity, SRS version (preschool, school-age), and child sex at birth.

**eTable 5.** Associations between PFAS and SRS total T-score stratified by SRS-2 form completed

| PFAS analyte    | Pre-school form of SRS <sup>a</sup> |                                        | School age form of SRS <sup>b</sup> |                                        |
|-----------------|-------------------------------------|----------------------------------------|-------------------------------------|----------------------------------------|
|                 | n <sub>adj</sub>                    | β <sub>adj</sub> (95% CI) <sup>c</sup> | n <sub>adj</sub>                    | β <sub>adj</sub> (95% CI) <sup>c</sup> |
| EtFOSAA         | 195                                 | -0.2 (-8.8, 8.5)                       | 482                                 | 0.8 (-1.4, 2.9)                        |
| NMFOSAA_MeFOSAA | 459                                 | 0.0 (-1.7, 1.7)                        | 598                                 | 1.1 (-0.9, 3.0)                        |
| PFDA            | 449                                 | -0.7 (-2.8, 1.3)                       | 672                                 | 1.6 (-0.2, 3.3)                        |
| PFHXS           | 474                                 | -0.8 (-2.7, 1.1)                       | 719                                 | -0.7 (-2.3, 0.9)                       |
| PFNA            | 474                                 | 1.0 (-1.2, 3.2)                        | 719                                 | 1.7 (-0.5, 3.9)                        |
| PFOA            | 474                                 | -1.3 (-3.5, 0.9)                       | 720                                 | 1.6 (-0.7, 3.9)                        |
| PFOS            | 474                                 | -0.8 (-2.9, 1.4)                       | 719                                 | 1.2 (-1.1, 3.5)                        |
| PFuNDA          | 449                                 | 0.6 (-1.2, 2.4)                        | 143                                 | -3.2 (-8.2, 1.7)                       |

CI, confidence interval; EtFOSAA, 2-(N-Ethyl-perfluorooctane sulfonamido) acetic acid; NMFOSAA\_MeFOSAA, N-methyl perfluorooctane sulfonamido acetic acid; PFDA, perfluorodecanoic acid; PFHXS, perfluorohexanesulfonic acid; PFNA, perfluorononanoic acid; PFOA, perfluorooctanoic acid; PFOS, perfluorooctane sulfonate; PFuNDA, perfluoroundecanoic acid; SRS, Social Responsiveness Score.

<sup>a</sup>Restricted to participants who completed the pre-school version of the SRS (generally 2.5-4.5 years old)

<sup>b</sup>Restricted to participants who completed the child version of SRS (generally 4-18 years old)

<sup>c</sup> Adjusted models included ECHO cohort, maternal age, race/ethnicity, educational attainment, and parity. T-score is standardized for SRS version (preschool, school-age) and child's sex.

**eTable 6.** Sensitivity analysis dropping samples below the LOD for the specific analytes with >20% values below the LOD.

| PFAS analyte    | SRS total T-score |                                        |
|-----------------|-------------------|----------------------------------------|
|                 | n <sub>adj</sub>  | β <sub>adj</sub> (95% CI) <sup>a</sup> |
| EtFOSAA         | 431               | 0.5 (-1.8, 2.8)                        |
| NMFOSAA_MeFOSAA | 753               | 1.2 (-0.4, 2.9)                        |
| PFDA            | 798               | 0.2 (-1.9, 2.2)                        |
| PFuNDA          | 355               | -0.9 (-3.5, 1.7)                       |

EtFOSAA, 2-(N-Ethyl-perfluorooctane sulfonamido) acetic acid; NMFOSAA\_MeFOSAA, N-methyl perfluorooctane sulfonamido acetic acid; PFAS, per- and polyfluoroalkyl substances; PFDA, perfluorodecanoic acid; PFuNDA, perfluoroundecanoic acid; SRS, Social Responsiveness Score.

<sup>a</sup> Adjusted models included ECHO cohort, maternal age, race/ethnicity, educational attainment, and parity. T-score is standardized for SRS version (preschool, school-age) and child's sex.

**eTable 7.** Associations of PFAS and T-scores on SRS subscales from single-pollutant models

| PFAS analyte    | SRS Social Communication and Interaction subscale (T-score) |                                     | SRS Restricted Interests and Repetitive Behavior subscale (T-score) |
|-----------------|-------------------------------------------------------------|-------------------------------------|---------------------------------------------------------------------|
|                 | n <sub>adj</sub>                                            | $\beta_{adj}$ (95% CI) <sup>a</sup> | $\beta_{adj}$ (95% CI) <sup>a</sup>                                 |
| EtFOSAA         | 677                                                         | 1.2 (-0.9, 3.2)                     | 0.6 (-1.5, 2.7)                                                     |
| NMFOSAA_MeFOSAA | 1057                                                        | 0.7 (-0.6, 2.1)                     | 0.1 (-1.3, 1.5)                                                     |
| PFDA            | 1121                                                        | 1.1 (-0.3, 2.4)                     | 0.3 (-1.1, 1.7)                                                     |
| PFHXS           | 1193                                                        | -0.8 (-2.0, 0.5)                    | -0.8 (-2.1, 0.6)                                                    |
| PFNA            | 1193                                                        | 1.8 (0.2, 3.4)                      | 1.1 (-0.6, 2.8)                                                     |
| PFOA            | 1194                                                        | 0.8 (-0.9, 2.4)                     | -0.1 (-1.9, 1.6)                                                    |
| PFOS            | 1193                                                        | 0.1 (-1.5, 1.8)                     | 0.2 (-1.6, 1.9)                                                     |
| PFUNDA          | 592                                                         | -0.2 (-2, 1.7)                      | -0.2 (-2.1, 1.8)                                                    |

EtFOSAA, 2-(N-Ethyl-perfluorooctane sulfonamido) acetic acid; NMFOSAA\_MeFOSAA, N-methyl perfluorooctane sulfonamido acetic acid; PFAS, per- and polyfluoroalkyl substances; PFDA, perfluorodecanoic acid; PFHXS, perfluorohexanesulfonic acid; PFNA, perfluorononanoic acid; PFOA, perfluorooctanoic acid; PFOS, perfluorooctane sulfonate; PFUNDA, perfluoroundecanoic acid; SRS, Social Responsiveness Score.

<sup>a</sup>Adjusted models included ECHO cohort, maternal age, race/ethnicity and educational attainment, parity, and SRS version (preschool, school-age). T-score is standardized by SRS version (preschool, school-age) and child's sex.

**eTable 8.** Associations of PFAS and ASD diagnoses from single-pollutant models

| PFAS analyte    | ASD clinical diagnosis                |                                           |                                         |
|-----------------|---------------------------------------|-------------------------------------------|-----------------------------------------|
|                 | n <sub>crude</sub> / n <sub>adj</sub> | OR <sub>crude</sub> (95% CI) <sup>a</sup> | OR <sub>adj</sub> (95% CI) <sup>b</sup> |
| EtFOSAA         | 716/710                               | 1.5 (0.4, 5.5)                            | 1.6 (0.4, 6.2)                          |
| NMFOSAA_MeFOSAA | 821/809                               | 2.1 (0.6, 7.1)                            | 2.0 (0.6, 6.9)                          |
| PFDA            | 890/878                               | 0.9 (0.3, 2.7)                            | 0.9 (0.3, 3.1)                          |
| PFHXS           | 986/974                               | 0.9 (0.3, 2.6)                            | 0.8 (0.3, 2.3)                          |
| PFNA            | 986/974                               | 0.7 (0.2, 2.7)                            | 0.7 (0.2, 2.7)                          |
| PFOA            | 987/975                               | 0.6 (0.2, 2.0)                            | 0.5 (0.1, 2.2)                          |
| PFOS            | 986/974                               | 0.6 (0.1, 2.3)                            | 0.4 (0.1, 1.8)                          |
| PFUNDA          | 297/288                               | 2.0 (0.3, 15.2)                           | 3.2 (0.4, 28.3)                         |

ASD, autism spectrum disorder; EtFOSAA, 2-(N-Ethyl-perfluorooctane sulfonamido) acetic acid; NMFOSAA\_MeFOSAA, N-methyl perfluorooctane sulfonamido acetic acid; PFAS, per- and polyfluoroalkyl substances; PFDA, perfluorodecanoic acid; PFHXS, perfluorohexanesulfonic acid; PFNA, perfluorononanoic acid; PFOA, perfluorooctanoic acid; PFOS, perfluorooctane sulfonate; PFUNDA, perfluoroundecanoic acid;

<sup>a</sup>Adjusted for ECHO cohort.

<sup>b</sup>Adjusted models included ECHO cohort, maternal age, race/ethnicity, educational attainment, parity, and child sex at birth.

**eTable 9.** Associations of PFAS and ASD diagnosis in mixture models using Bayesian Weighted Sums (n=809)

| Weighted sums                             | ASD diagnosis     |                      |
|-------------------------------------------|-------------------|----------------------|
|                                           | OR <sub>adj</sub> | 95% HPD <sup>a</sup> |
| Summed effect                             | 1.4               | (0.2, 10.2)          |
| w(PFOA) <sup>b</sup>                      | 0.17              | (0.00, 0.44)         |
| w(PFOS) <sup>b</sup>                      | 0.16              | (0.00, 0.45)         |
| w(PFNA) <sup>b</sup>                      | 0.16              | (0.00, 0.44)         |
| w(PFHxS) <sup>b</sup>                     | 0.16              | (0.00, 0.44)         |
| w(NMFOSAA_MeFOSAA) <sup>b</sup>           | 0.18              | (0.00, 0.48)         |
| w(PFDA) <sup>b</sup>                      | 0.16              | (0.00, 0.44)         |
| <b>Individual association<sup>c</sup></b> |                   |                      |
| PFOA                                      | 1.1               | (0.3, 3.2)           |
| PFOS                                      | 0.9               | (0.3, 2.8)           |
| PFNA                                      | 1.1               | (0.3, 3.3)           |
| PFHxS                                     | 1.0               | (0.4, 2.4)           |
| NMFOSAA_MeFOSAA                           | 1.4               | (0.6, 3.9)           |
| PFDA                                      | 1.1               | (0.4, 2.6)           |

ASD, autism spectrum disorder; HPD, Highest Posterior Density; NMFOSAA\_MeFOSAA, N-methyl perfluorooctane sulfonamido acetic acid; PFAS, per- and polyfluoroalkyl substances; PFDA, perfluorodecanoic acid; PFHxS, perfluorohexanesulfonic acid; PFNA, perfluorononanoic acid; PFOA, perfluorooctanoic acid; PFOS, perfluorooctane sulfonate; PFuNDA, perfluoroundecanoic acid;

<sup>a</sup>Adjusted models included ECHO cohort, maternal age, race/ethnicity, educational attainment, parity, and child sex at birth.

<sup>b</sup>Percent (%) weight contributed by each mixture component to the summed association. Weight and 95% HPD reported to two decimal places.

<sup>c</sup>Co-adjusted for other PFAS using semi-Bayesian shared mean approach.

**eTable 10.** Sex-stratified associations between PFAS and SRS total T-score

| PFAS analyte    | SRS total T-score                               |                                                   | P <sub>interaction</sub> <sup>b</sup> |
|-----------------|-------------------------------------------------|---------------------------------------------------|---------------------------------------|
|                 | Males<br>$\beta_{adj}$<br>(95% CI) <sup>a</sup> | Females<br>$\beta_{adj}$<br>(95% CI) <sup>a</sup> |                                       |
| EtFOSAA         | 1.1 (-2.1, 4.4)                                 | 0.3 (-2.2, 2.8)                                   | 0.34                                  |
| NMFOSAA_MeFOSAA | -0.4 (-2.5, 1.6)                                | 1.7 (0, 3.4)                                      | 0.06                                  |
| PFDA            | 0.6 (-1.6, 2.7)                                 | 1.1 (-0.6, 2.8)                                   | 0.55                                  |
| PFHXS           | -0.7 (-2.7, 1.4)                                | -1 (-2.5, 0.5)                                    | 0.55                                  |
| PFNA            | 2.2 (-0.3, 4.7)                                 | 0.7 (-1.3, 2.6)                                   | 0.79                                  |
| PFOA            | 0.9 (-1.8, 3.5)                                 | -0.3 (-2.2, 1.7)                                  | 0.20                                  |
| PFOS            | -0.8 (-3.5, 1.8)                                | 1.3 (-0.6, 3.2)                                   | 0.02                                  |
| PFUNDA          | 0.2 (-2.4, 2.9)                                 | -0.3 (-2.4, 1.9)                                  | 0.81                                  |

EtFOSAA, 2-(N-Ethyl-perfluorooctane sulfonamido) acetic acid; NMFOSAA\_MeFOSAA, N-methyl perfluorooctane sulfonamido acetic acid; PFAS, per- and polyfluoroalkyl substances; PFDA, perfluorodecanoic acid; PFHXS, perfluorohexanesulfonic acid; PFNA, perfluorononanoic acid; PFOA, perfluorooctanoic acid; PFOS, perfluorooctane sulfonate; PFUNDA, perfluoroundecanoic acid; SRS, Social Responsiveness Scale.

<sup>a</sup> Adjusted models included ECHO cohort, maternal age, race/ethnicity, educational attainment and parity and SRS version (preschool, school-age). T-score is standardized for child's sex.

<sup>b</sup> P-value obtained from an interaction model which included both a first order term for sex and the cross-product term of child sex and PFAS analyte added to adjusted model. We considered P-interaction<0.05 to be statistically significant.



**eTable 11.** Sex-stratified associations between PFAS and SRS using Bayesian Weighted Sums

| Weighted sums                             | SRS total T-score |                      |               |                      |
|-------------------------------------------|-------------------|----------------------|---------------|----------------------|
|                                           | Male              |                      | Female        |                      |
|                                           | $\beta_{adj}$     | 95% HPD <sup>a</sup> | $\beta_{adj}$ | 95% HPD <sup>a</sup> |
| Summed association                        | -0.6              | (-4.1, 2.8)          | 1.5           | (-1.2, 4.3)          |
| w(PFOA) <sup>b</sup>                      | 0.18              | (0.00, 0.46)         | 0.14          | (0.00, 0.39)         |
| w(PFOS) <sup>b</sup>                      | 0.16              | (0.00, 0.44)         | 0.21          | (0.00, 0.51)         |
| w(PFNA) <sup>b</sup>                      | 0.15              | (0.00, 0.43)         | 0.15          | (0.00, 0.42)         |
| w(PFHxS) <sup>b</sup>                     | 0.17              | (0.00, 0.44)         | 0.12          | (0.00, 0.37)         |
| w(NMFOSAA_MeFOSAA) <sup>b</sup>           | 0.17              | (0.00, 0.45)         | 0.20          | (0.00, 0.51)         |
| w(PFDA) <sup>b</sup>                      | 0.17              | (0.00, 0.44)         | 0.17          | (0.00, 0.45)         |
| <b>Individual association<sup>c</sup></b> |                   |                      |               |                      |
| PFOA                                      | -0.9              | (-4.4, 1.7)          | -0.5          | (-3.1, 1.6)          |
| PFOS                                      | 1.9               | (-1.6, 4.5)          | 1.9           | (-0.6, 5.0)          |
| PFNA                                      | 1.9               | (-1.0, 5.1)          | -0.1          | (-2.5, 2.1)          |
| PFHxS                                     | -0.5              | (-2.6, 1.4)          | -1.3          | (-3.3, 0.5)          |
| NMFOSAA_MeFOSAA                           | -0.8              | (-2.9, 0.9)          | 0.9           | (-0.6, 2.5)          |
| PFDA                                      | -1.3              | (-3.8, 0.8)          | 0.6           | (-1.2, 2.3)          |

HPD, Highest Posterior Density; NMFOSAA\_MeFOSAA, N-methyl perfluorooctane sulfonamido acetic acid; PFAS, per- and polyfluoroalkyl substances; PFDA, perfluorodecanoic acid; PFHxS, perfluorohexanesulfonic acid; PFNA, perfluorononanoic acid; PFOA, perfluorooctanoic acid; PFOS, perfluorooctane sulfonate; PFuNDA, perfluoroundecanoic acid; SRS, Social Responsiveness Scale.

<sup>a</sup> Adjusted models included ECHO cohort, maternal age, race/ethnicity, educational attainment, parity, and SRS version (preschool, school-age).

<sup>b</sup> Percent (%) weight contributed by each mixture component to the summed association. Weight and 95% HPD reported to two decimal places.

<sup>c</sup> Co-adjusted for other PFAS using semi-Bayesian approach

**eFigure 1.** Directed acyclic graph<sup>a</sup>

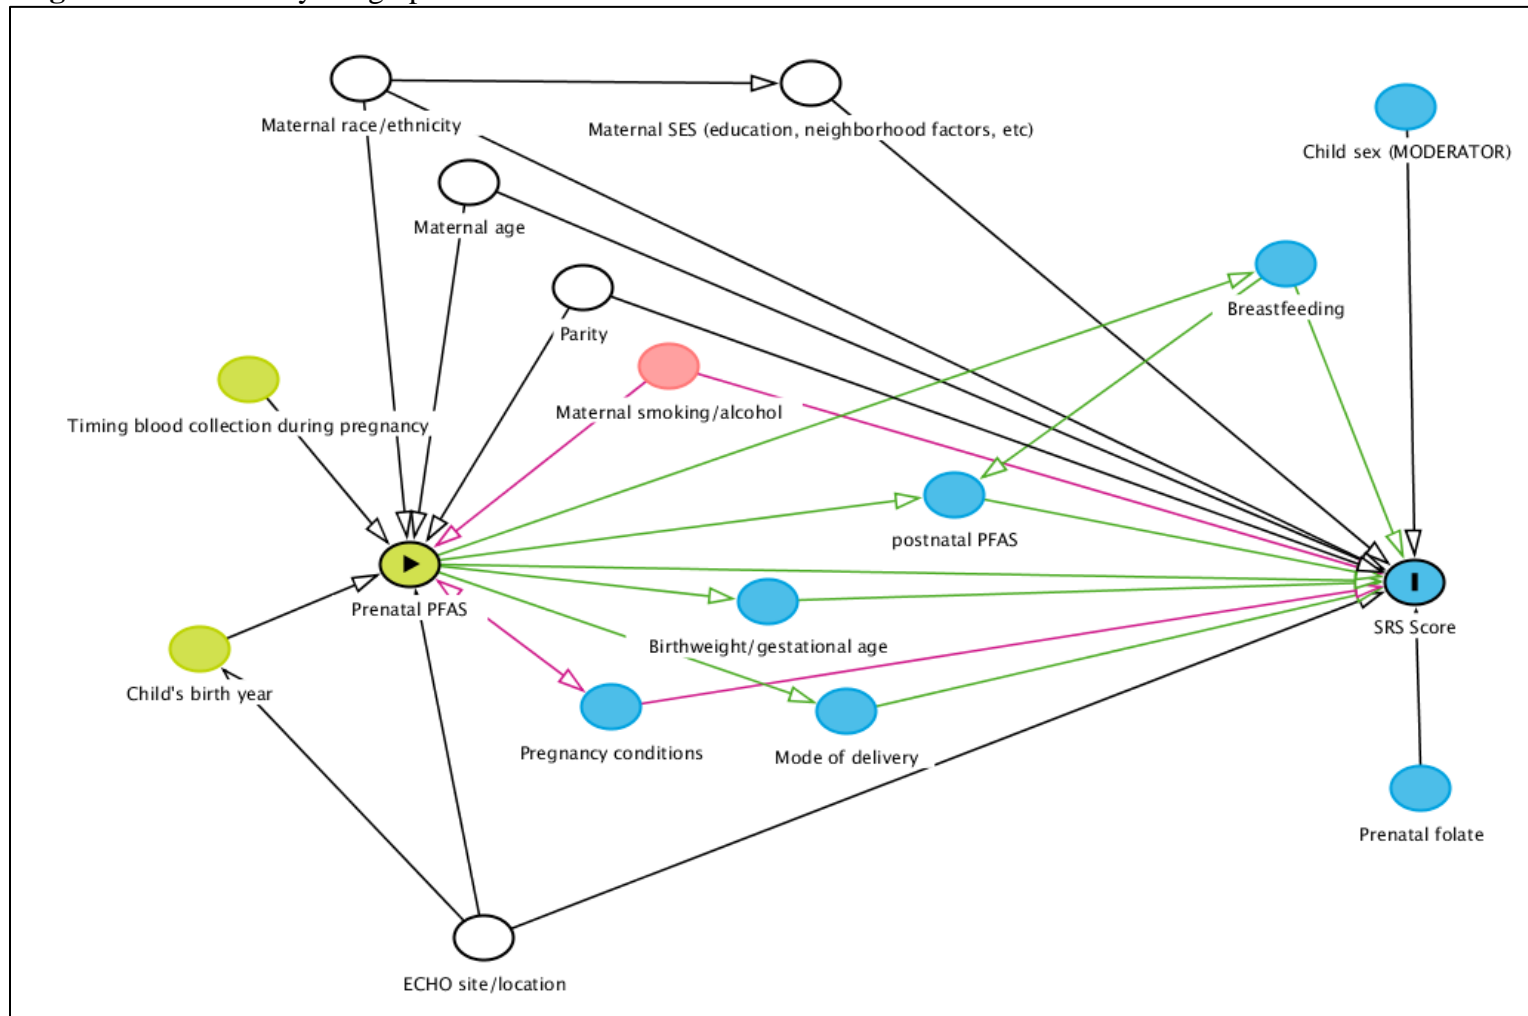

ECHO, Environmental influences on Child Health Outcomes; SES, socioeconomic status.

<sup>a</sup> Potential mediators (e.g., birth weight, gestational age, pregnancy complications) were not included in the final analytic models.

**eFigure 2.** Boxplots of PFAS analytes (log-transformed) in the pooled ECHO sample

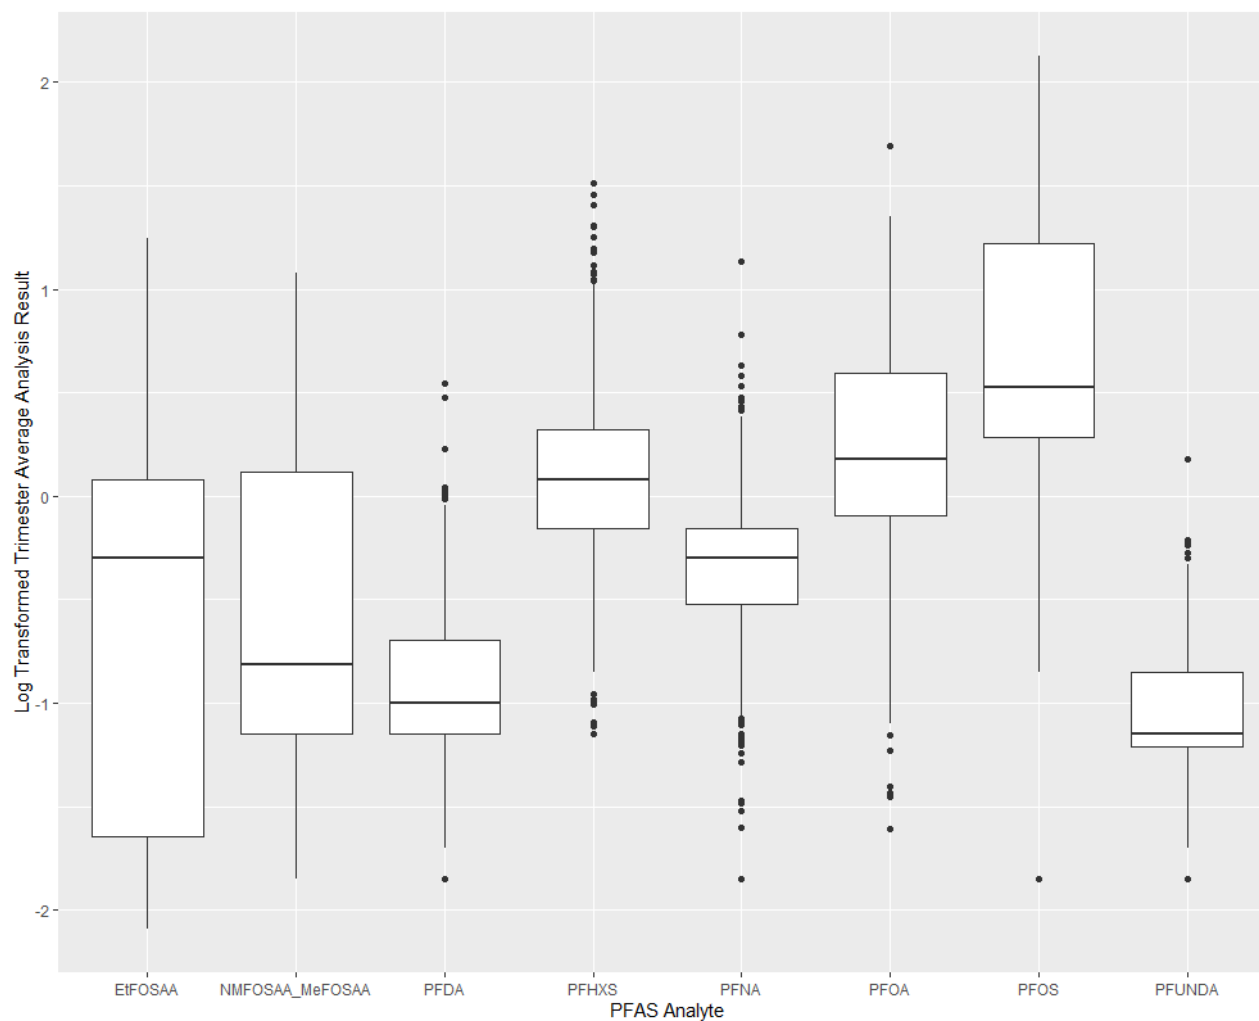

EtFOSAA, 2-(N-Ethyl-perfluorooctane sulfonamido) acetic acid; NMFOSAA\_MeFOSAA, N-methyl perfluorooctane sulfonamido acetic acid; PFAS, per- and polyfluoroalkyl substances; PFDA, perfluorodecanoic acid; PFHXS, perfluorohexanesulfonic acid; PFNA, perfluorononanoic acid; PFOA, perfluorooctanoic acid; PFOS, perfluorooctane sulfonate; PFUNDA, perfluroundecanoic acid.

**eFigure 3.** Boxplots of PFAS analyte distributions (log-transformed) by ECHO cohort

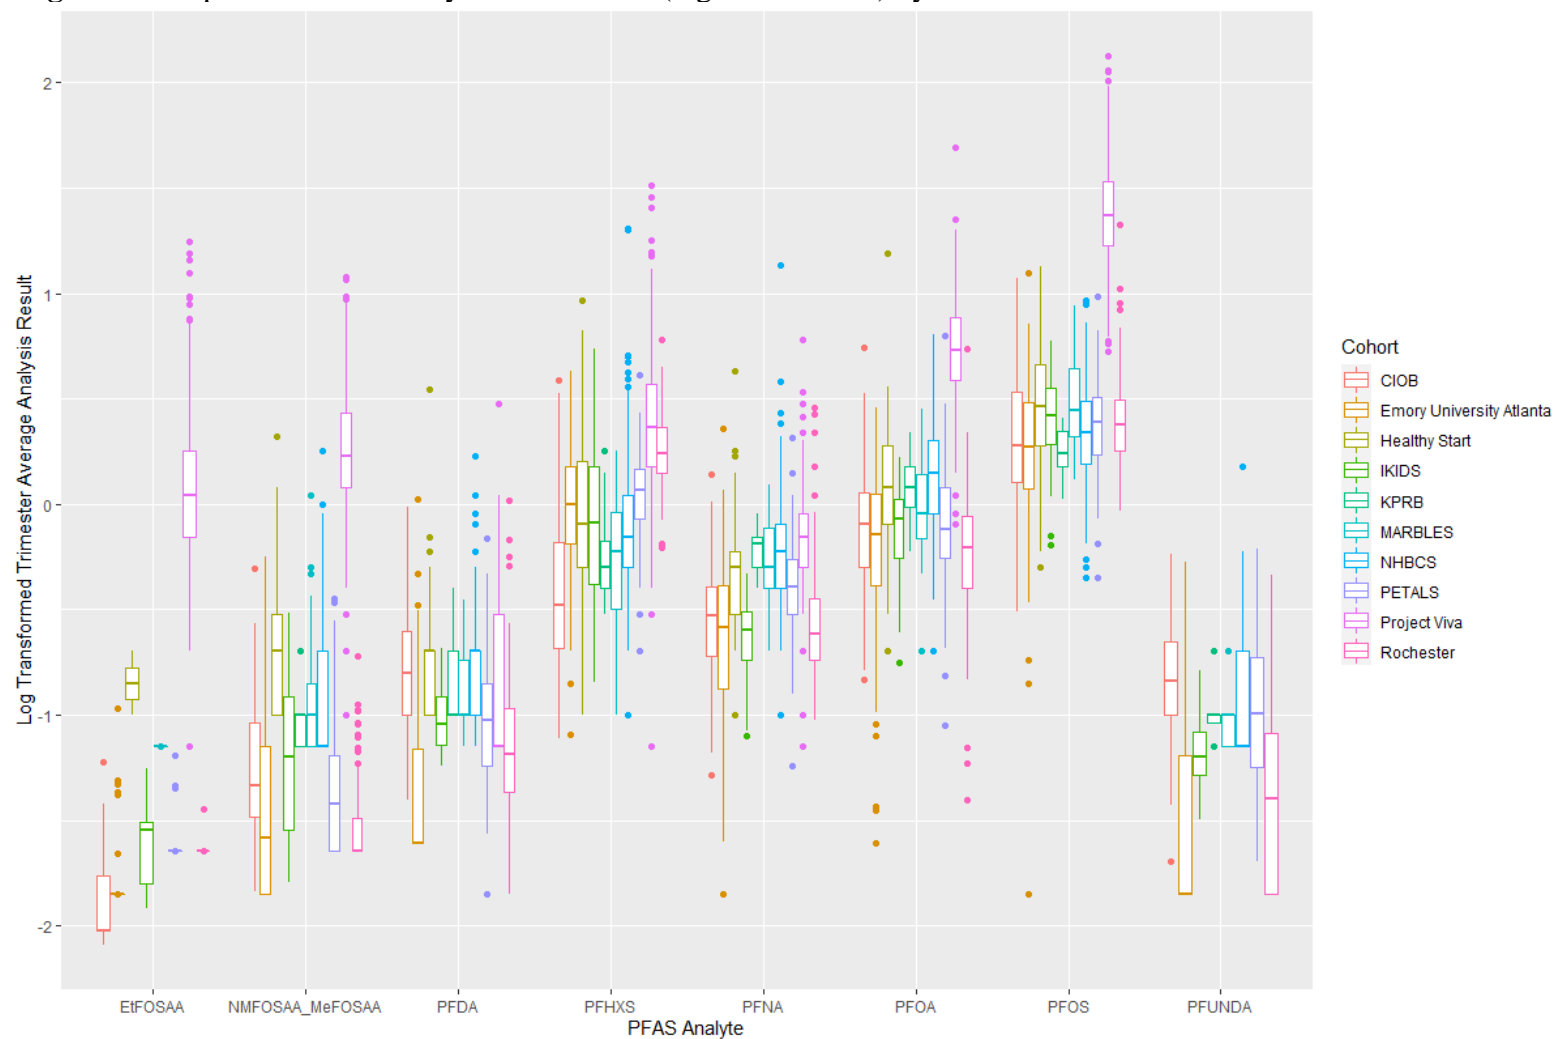

EtFOSAA, 2-(N-Ethyl-perfluorooctane sulfonamido) acetic acid; NMFOSAA\_MeFOSAA, N-methyl perfluorooctane sulfonamido acetic acid; PFAS, per- and polyfluoroalkyl substances; PFDA, perfluorodecanoic acid; PFHXS, perfluorohexanesulfonic acid; PFNA, perfluorononanoic acid; PFOA, perfluorooctanoic acid; PFOS, perfluorooctane sulfonate; PFUNDA, perfluoroundecanoic acid.

**eFigure 4.** Correlation plots of PFAS analytes

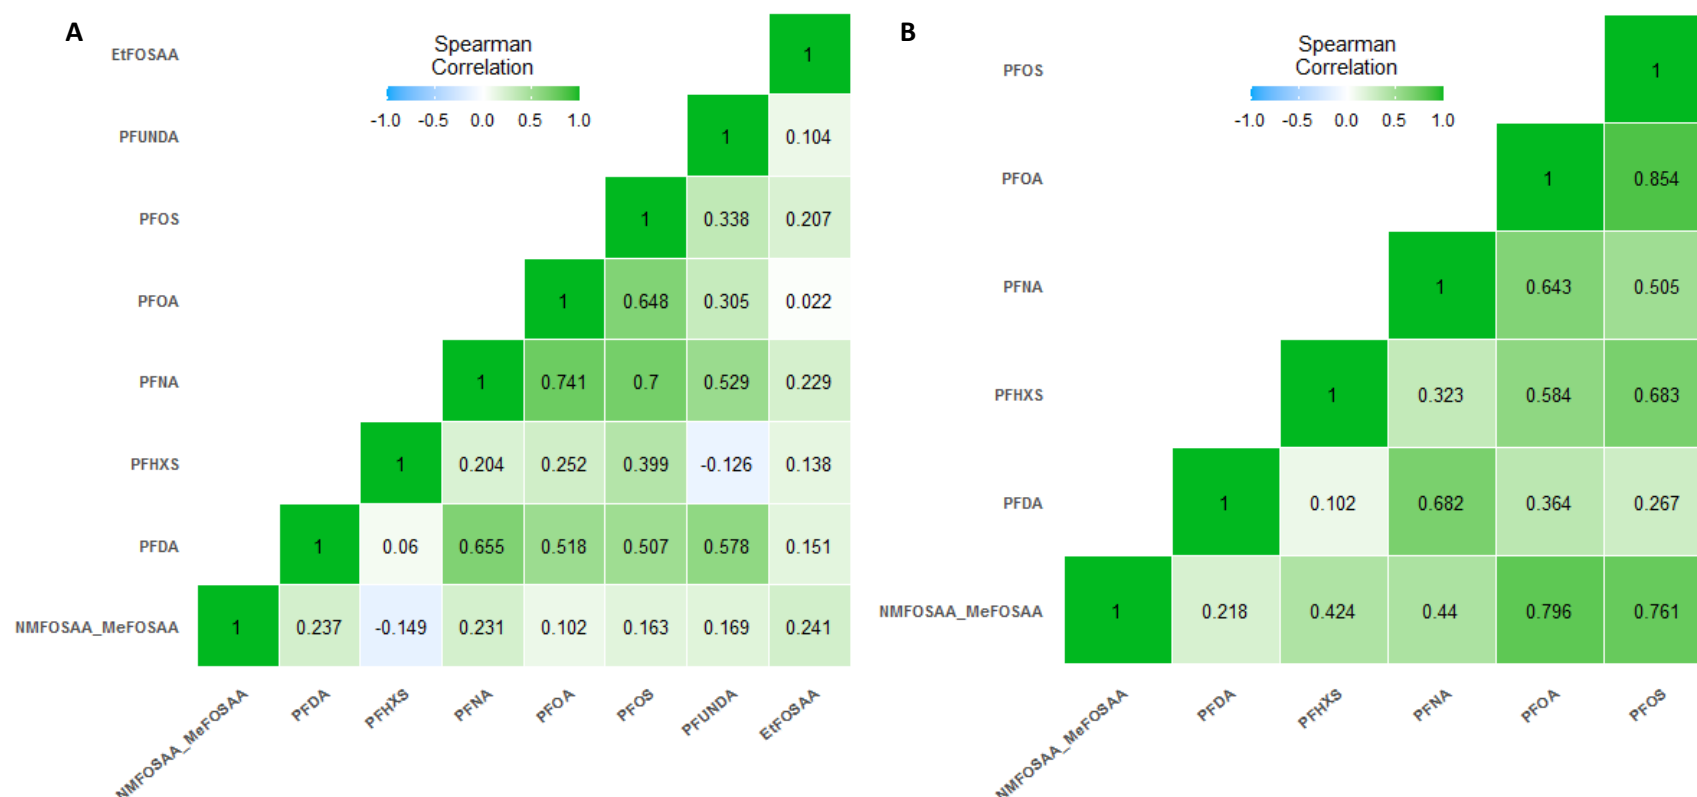

A) Correlation among all 8 PFAS passing original detection criteria (n=360 due to some analytes not being measured in all individuals); B) Correlation among 6 PFAS after using stricter detection criteria (n=1231).

EtFOSAA, 2-(N-Ethyl-perfluorooctane sulfonamido) acetic acid; NMFOSAA\_MeFOSAA, N-methyl perfluorooctane sulfonamido acetic acid; PFAS, per- and polyfluoroalkyl substances; PFDA, perfluorodecanoic acid; PFHXS, perfluorohexanesulfonic acid; PFNA, perfluorononanoic acid; PFOA, perfluorooctanoic acid; PFOS, perfluorooctane sulfonate; PFUNDA, perfluoroundecanoic acid.

eFigure 5. Coefficient plots of leave-one-out results for SRS total T-score. The Y-axis lists the name of the cohort that was left out of the regression model. All models were adjusted for ECHO cohort, maternal age, race/ethnicity, educational attainment and parity and SRS version (preschool, school-age). T-score is standardized by SRS version and child's sex.

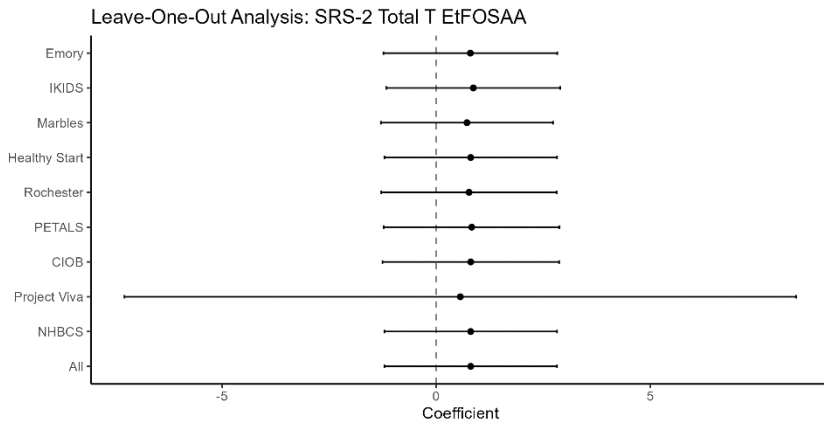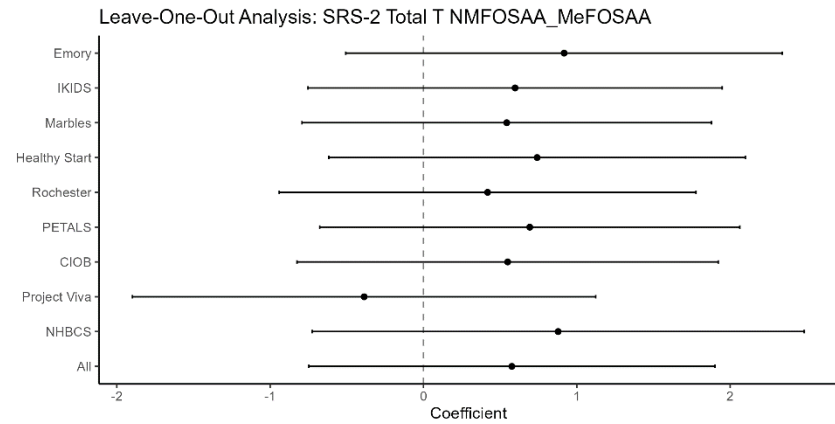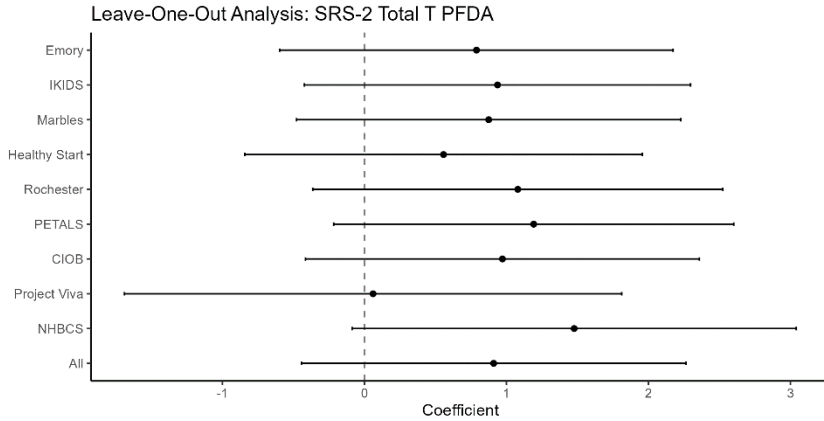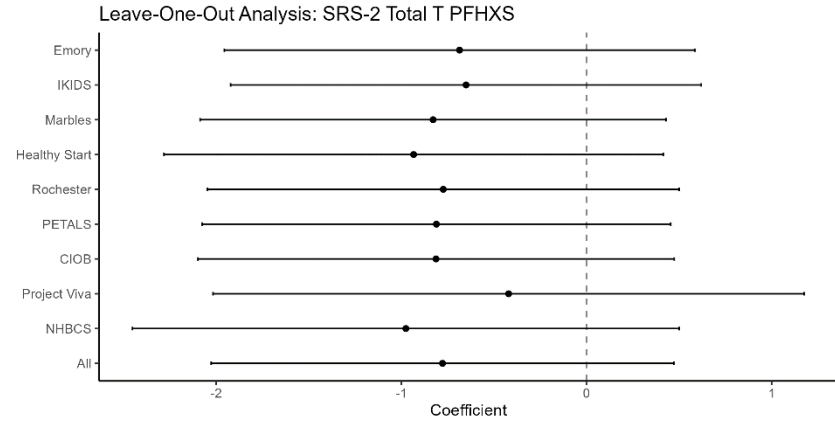

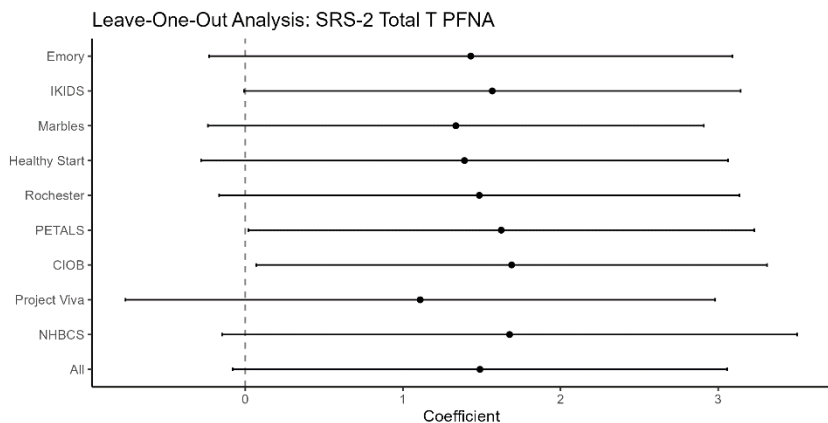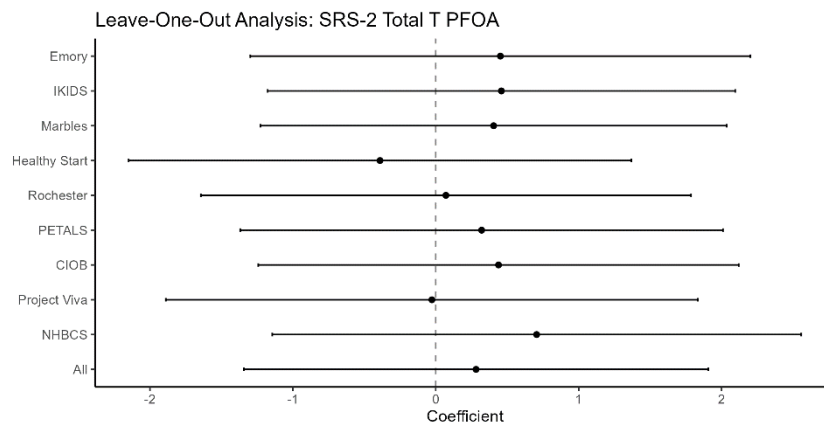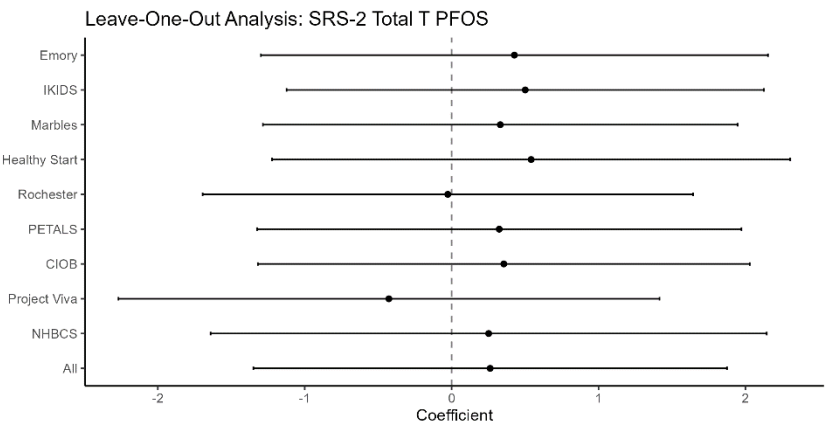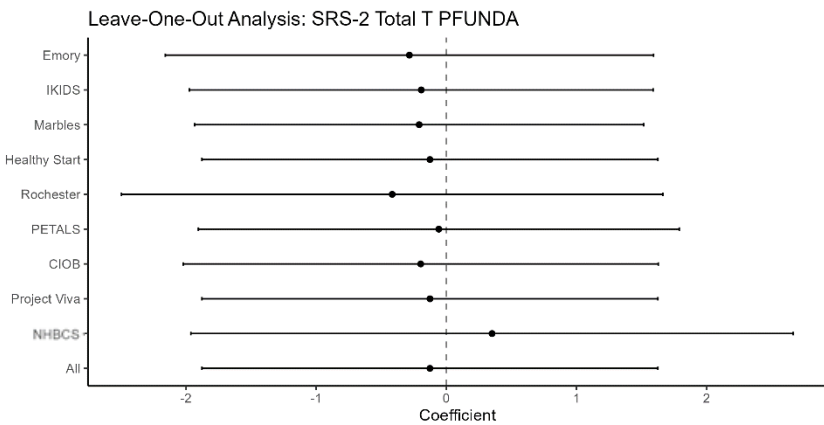

EtFOSAA, 2-(N-Ethyl-perfluorooctane sulfonamido) acetic acid; NMFOSAA\_MeFOSAA, N-methyl perfluorooctane sulfonamido acetic acid; PFAS, per- and polyfluoroalkyl substances; PFDA, perfluorodecanoic acid; PFHXS, perfluorohexanesulfonic acid; PFNA, perfluorononanoic acid; PFOA, perfluorooctanoic acid; PFOS, perfluorooctane sulfonate; PFuNDA, perfluoroundecanoic acid; SRS, Social Responsiveness Scale.
